# Supplementary material for: Dependence of copper(i) stability on long-range electromagnetic effects of Au under reducing atmospheres: the size effect of Au cores
Source: Royal Society of Chemistry journal article supplement (doi:10.1039/d3nr04330d), 2023-12-19
Supplement: d3nr04330d1.pdf [file d3nr04330d1.pdf]

# Supporting Information for

## Dependence of Copper(I) Stability on Long-range Electromagnetic Effects of Au under Reducing Atmospheres: the Size Effect of Au Cores

Xin Huang,<sup>a,b</sup> Haitao Li,<sup>\*a</sup> Bin Zhang,<sup>c</sup> Yin Zhang,<sup>a</sup> Hao Wang,<sup>a</sup> Lijun Ban,<sup>a</sup> Yixuan Xu,<sup>a</sup>  
Yongxiang Zhao<sup>\*a</sup>

<sup>a</sup> Engineering Research Center of Ministry of Education for Fine Chemicals, School of Chemistry and Chemical Engineering, Shanxi University, Taiyuan 030006, China.

<sup>b</sup> Department of Chemistry and Chemical Engineering, Jinzhong university, Jinzhong 030619, China.

<sup>c</sup> State Key Laboratory of Coal Conversion, Institute of Coal Chemistry, Chinese Academy of Sciences, Taiyuan 030001, China.

### **\*CORRESPONDING AUTHORS**

Address: Shanxi University, 92 Wucheng Road ,Taiyuan 030006, China.

Haitao Li, Email: htli@sxu.edu.cn

Yongxiang Zhao, Email:yxzhao@sxu.edu.cn

## 1. CHARACTERIZATIONS

The amounts of Cu and Au in the catalysts were determined using an iCAP 7400 ICP-OES inductively coupled plasma emission spectrometer (Thermo Fisher Scientific, USA).

Transmission electron microscopy (TEM), high-resolution transmission electron microscopy (HR-TEM), and high angle annular dark-field scanning transmission electron microscopy (HAADF-STEM) analyses were performed using a USA FEI TECNAI G2 F20 S-TWIN TEM, operated at 200 kV. Energy-dispersive X-ray spectroscopy (EDS) experiments were performed using an Oxford EDAX Genesis transmission electron microscope.

X-ray diffraction (XRD) patterns were recorded on a Bruker D8 Advance X-ray diffractometer with Cu K $\alpha$  rays ( $\lambda = 1.542 \text{ \AA}$ ) at a voltage of 40 kV, current of 40 mA, and a scanning speed of  $0.1^\circ \cdot \text{s}^{-1}$ , where the size of metal oxide was obtained by the Scherrer equation  $D = K\lambda/(\beta \cos \theta)$ .

The H<sub>2</sub>-TPR test was performed on a USA Micromeritics AutoChem II 2920 fully automated programmable temperature chemisorption instrument with a catalyst loading of 30 mg. The sample was purged with Ar for 30 min at 200 °C, cooled to room temperature, purged with a 5%/95% mixture of H<sub>2</sub>/Ar at a flow rate of 40 ml/min and a heating rate of 10°C/min, and the hydrogen consumption was detected by TCD.

X-ray photoelectron spectroscopy (XPS) and X-ray Auger electron spectroscopy (XAES) measurements were performed on an Thermo SCIENTIFIC K-Alpha(Thermo Fisher Scientific, USA) using a monochromatic Al K $\alpha$ -ray source ( $h\nu = 1486.8 \text{ eV}$ ), and the binding energy in the spectrum was calibrated from contaminant carbon ( $C 1s = 284.8 \text{ eV}$ ).

The ultraviolet photoelectron spectra (UPS) were acquired on a commercial “Thermo Scientific K-Alpha” using 21.2 eV of Helium discharge as the excitation source, and a negative

bias of  $-5$  V was applied during the measurement. Charge correction was carried out using the binding energy standard of  $C1s=284.8$  eV.

Raman spectra were obtained from a LabRAM HR Evolution Raman spectrometer (HORIBA Scientific, France), the laser was focused on the sample surface through a  $50\times$  long-distance objective lens with a  $1\ \mu\text{m}$  spot size. A holographic grating of  $1800\text{gr}/\text{mm}$  was used, and the acquisition time was  $10$  s. The Raman spectra were obtained with an acquisition time of  $10$  s and collection number of  $1$ , using a holographic grating with  $1800$  grooves/mm. The Raman band of the silicon wafer at  $520.7\ \text{cm}^{-1}$  was employed to calibrate the spectrometer.

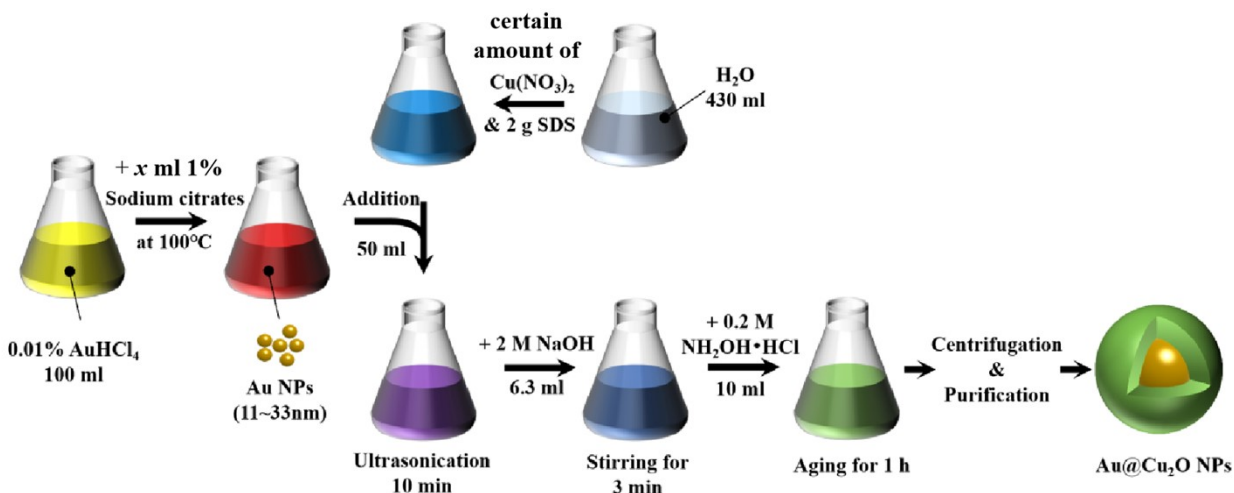

**Scheme S1.** Schematic illustration of the synthesis of Au@Cu<sub>2</sub>O core-shell NPs. Here ‘ $x$ ’ equals  $0.8$ ,  $1.2$ ,  $1.8$ ,  $2.4$  and  $3.0$  ml. The colors shown are the approximate solution colors observed during the reaction of the synthesis of Au@Cu<sub>2</sub>O core shell NPs.

## 2. Experimental supplementary data section

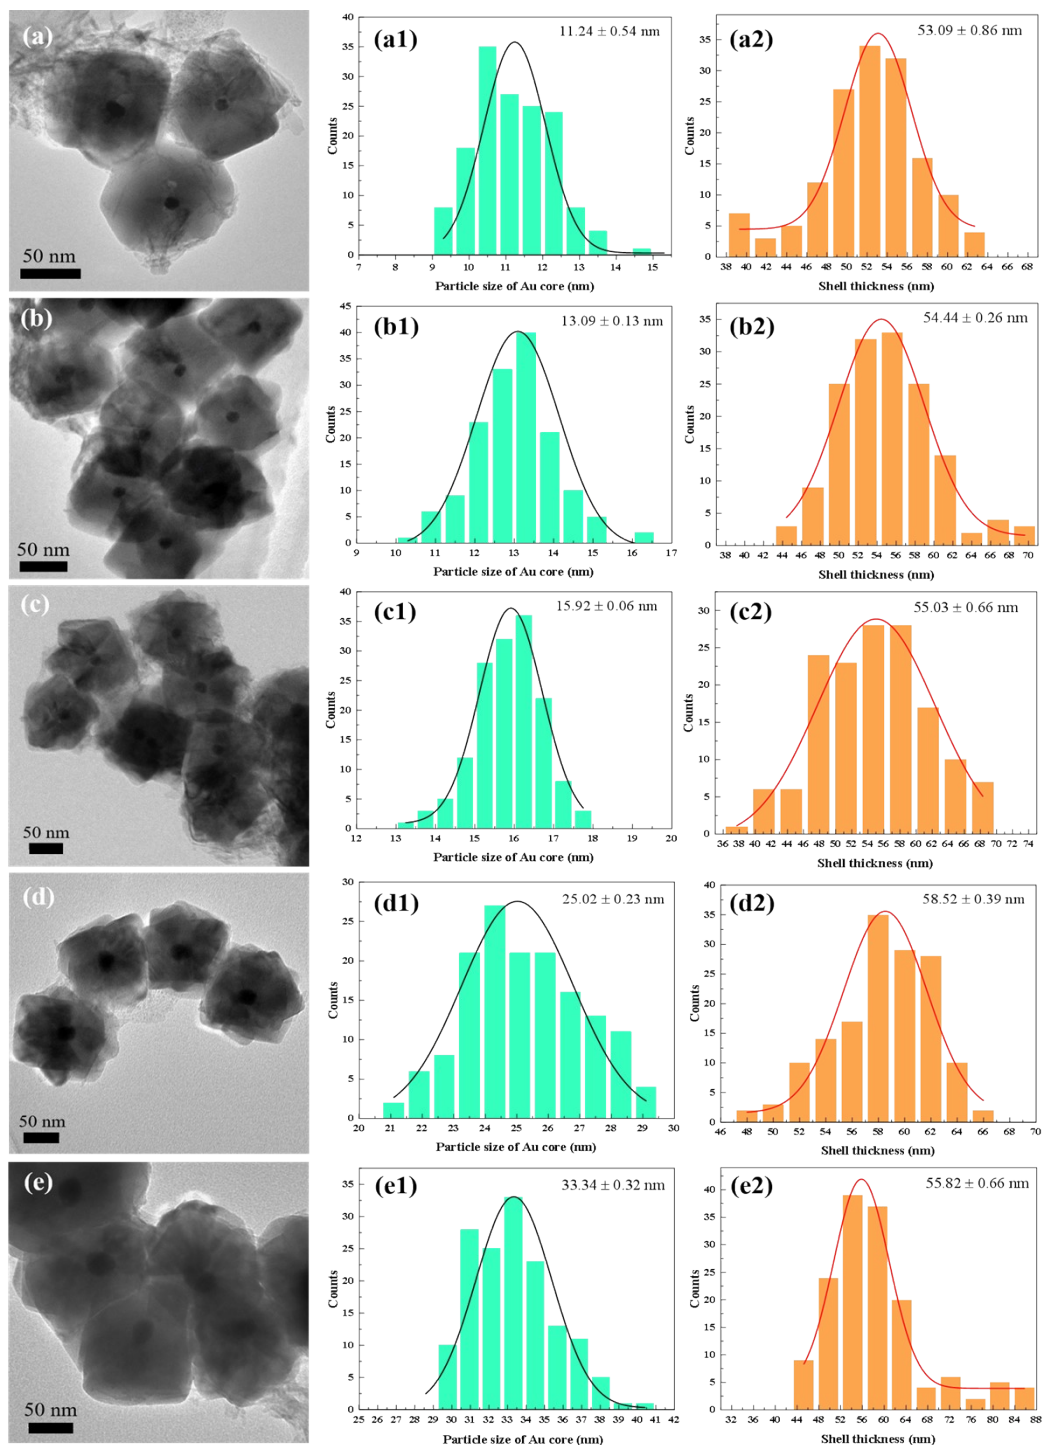

**Figure S1.** TEM images of as-synthesized Au@Cu<sub>2</sub>O core-shell NPs named (a) 11Au@Cu<sub>2</sub>O, (b) 13Au@Cu<sub>2</sub>O, (c) 16Au@Cu<sub>2</sub>O, (d) 25Au@Cu<sub>2</sub>O and (e) 33Au@Cu<sub>2</sub>O. Histograms of (a1 - e1) Au core size and (a2 - e2) Cu<sub>2</sub>O shell thickness shown in panels a - e, respectively.

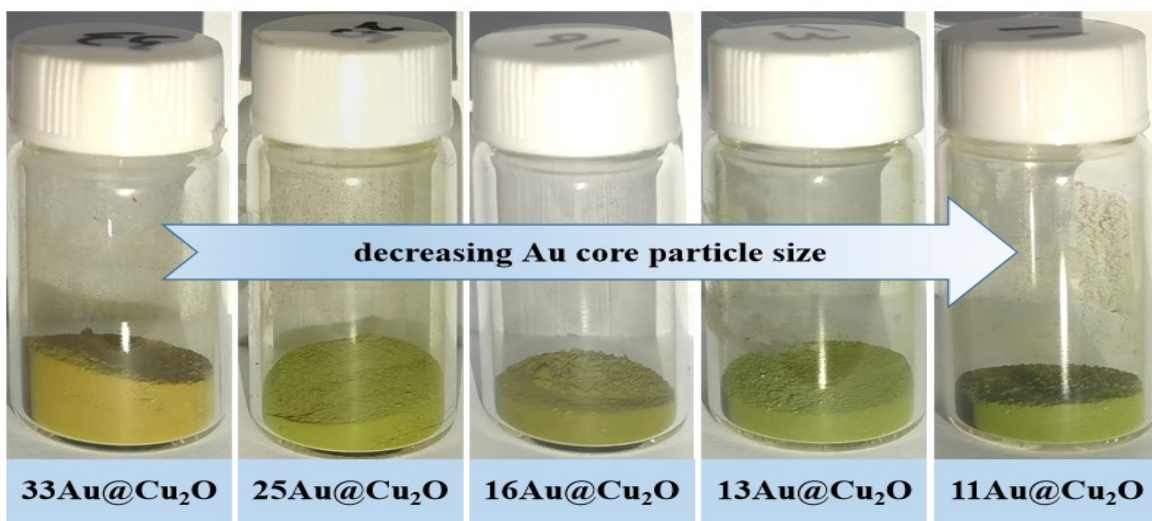

**Figure S2.** The color of Au@Cu<sub>2</sub>O NPs varies with Au core particle size.

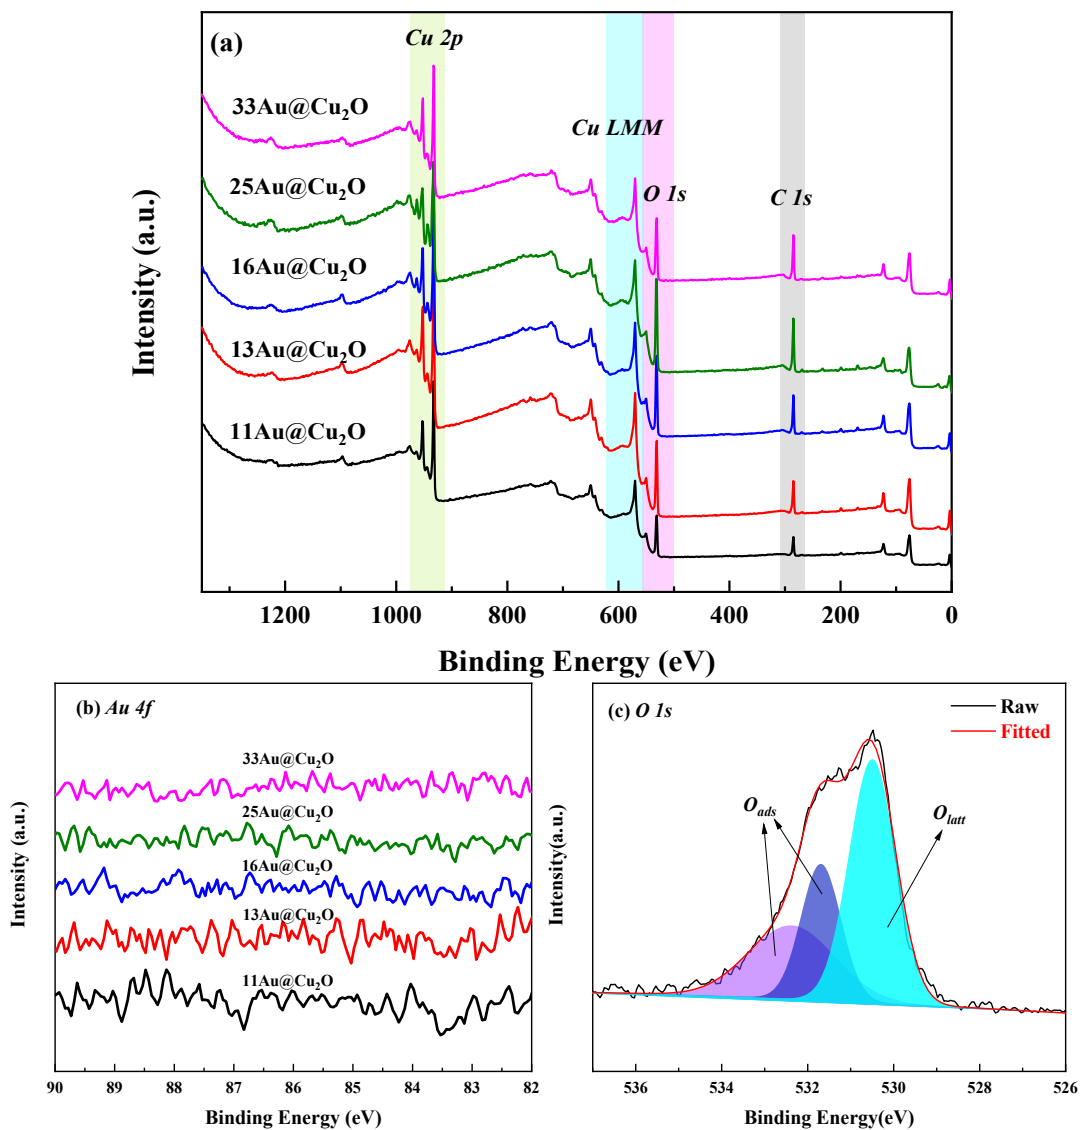

**Figure S3.** (a) The XPS survey spectrum and (b) High-resolution Au 4f XPS spectra for Au@Cu<sub>2</sub>O. (c) High-resolution O 1s XPS spectra for 16Au@Cu<sub>2</sub>O.

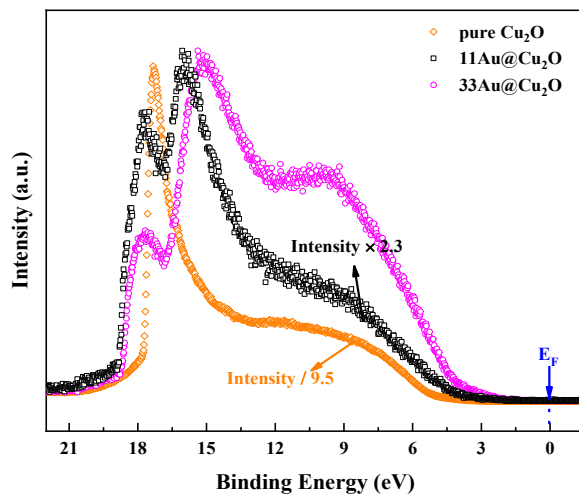

**Figure S4.** UPS spectra recorded on pure  $\text{Cu}_2\text{O}$ ,  $11\text{Au}@Cu_2\text{O}$  and  $33\text{Au}@Cu_2\text{O}$ .

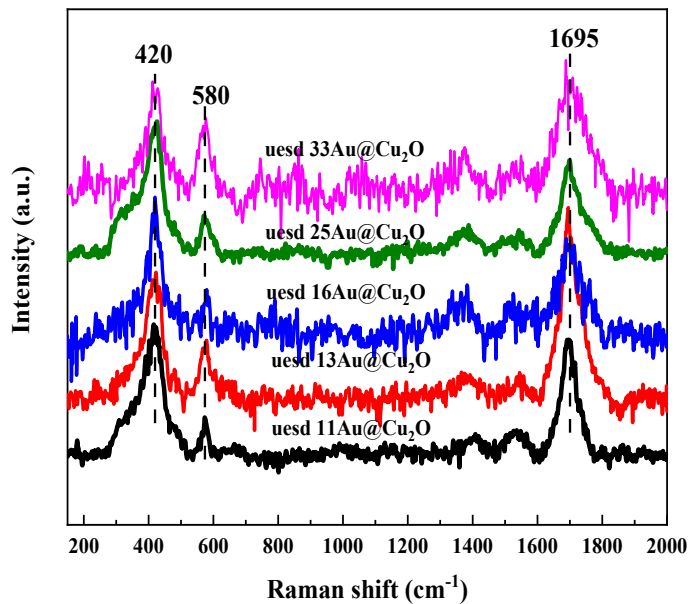

**Figure S5.** Raman spectra of  $\text{Au}@Cu_2\text{O}$  catalysts after the ethynylation of formaldehyde.

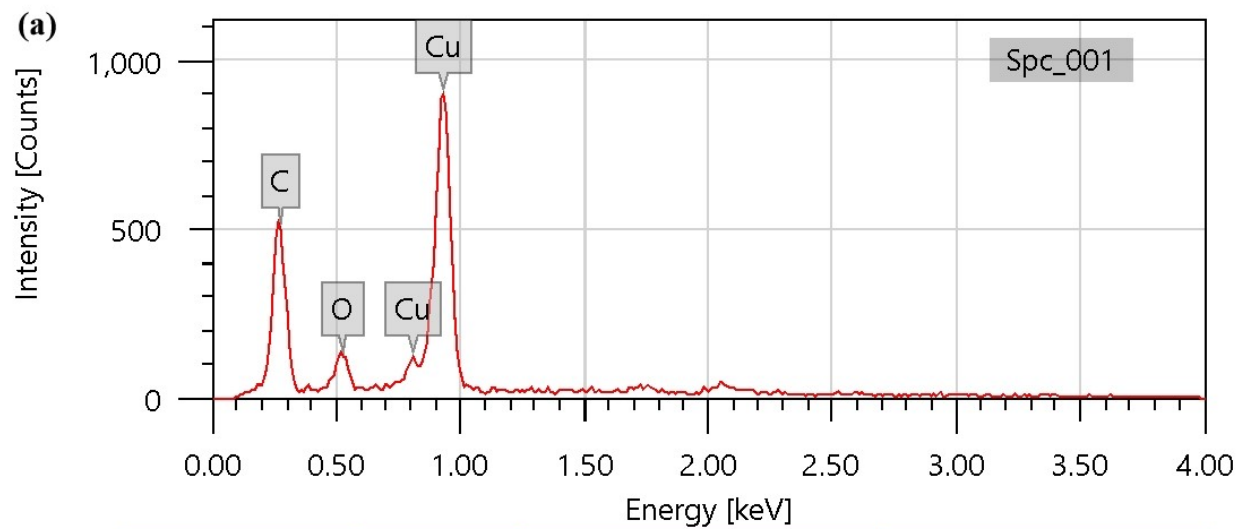

(b)

| Element | Line | Atomic %     | Net Error %  |
|---------|------|--------------|--------------|
| C       | K    | 54.62        | 0.45         |
| O       | K    | 9.95         | 0.33         |
| Cu      | L    | 35.44        | 0.47         |
| Au      | L    | not detected | not detected |

**Figure S6.** (a) The particle EDX-SEM image of 16Au@Cu<sub>2</sub>O after the ethynylation of formaldehyde. (b) Surface analysis of EDX for 16Au@Cu<sub>2</sub>O after the ethynylation of formaldehyde.



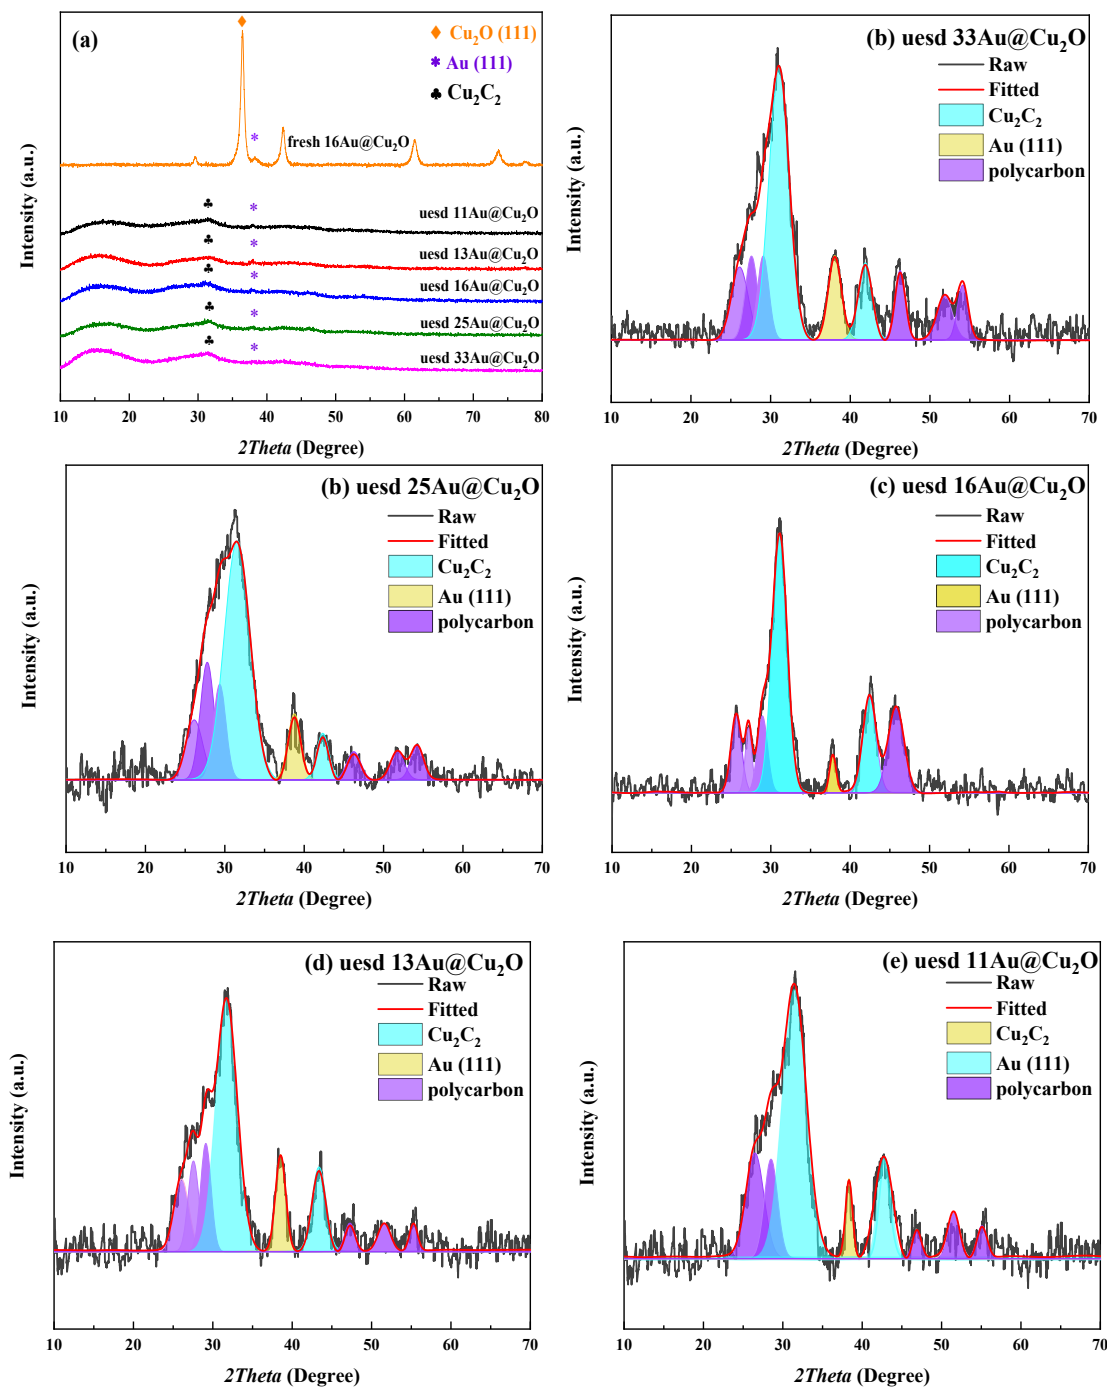

**Figure S7.** (a) XRD patterns of Au@Cu<sub>2</sub>O catalysts after the ethynylation of formaldehyde. (b - f) The enlarged XRD patterns after baseline-correcting and smoothing (15 pts PF smooth) by Origin 2021b software.

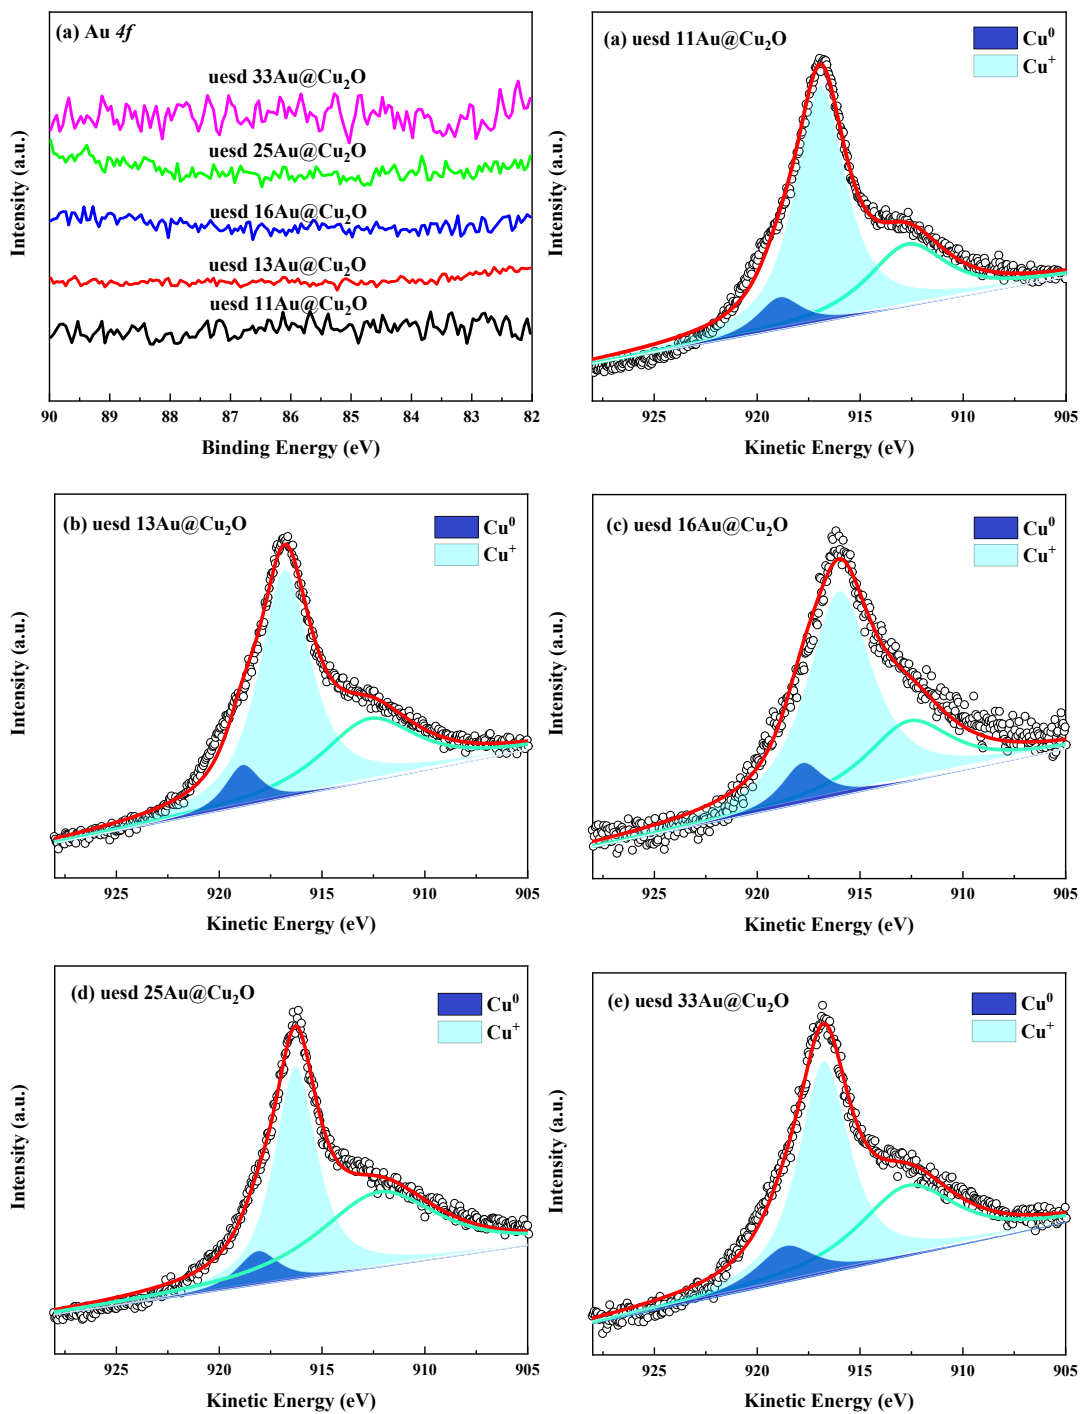

**Figure S8.** (a) Au 4f XPS spectra and (b - f) Cu LMM Auger spectra of the catalysts after the ethynylation of formaldehyde.

**Table S1.** Chemical composition, physicochemical properties and catalytic performance of propargyl alcohol in Au@Cu<sub>2</sub>O samples with different core size.

| Sample                 | Weight ratio (wt%) <sup>[a]</sup> |      | n <sub>Cu</sub><br>(×10 <sup>-2</sup><br>mol·g <sup>-1</sup> ) | BET<br>surface<br>area<br>(m <sup>2</sup> ·g <sup>-1</sup> ) <sup>[b]</sup> | Average<br>pore size<br>(nm) <sup>[c]</sup> | Catalytic performance <sup>[d]</sup> |                                         |
|------------------------|-----------------------------------|------|----------------------------------------------------------------|-----------------------------------------------------------------------------|---------------------------------------------|--------------------------------------|-----------------------------------------|
|                        | Cu                                | Au   |                                                                |                                                                             |                                             | propargyl<br>alcohol<br>yield (%)    | propargyl<br>alcohol<br>selectivity (%) |
| 11Au@Cu <sub>2</sub> O | 67.78                             | 1.95 | 1.07                                                           | 40.62                                                                       | 22.3                                        | 1.37                                 | 2.06                                    |
| 13Au@Cu <sub>2</sub> O | 68.76                             | 2.02 | 1.08                                                           | 46.77                                                                       | 21.5                                        | 1.32                                 | 2.01                                    |
| 16Au@Cu <sub>2</sub> O | 72.16                             | 2.12 | 1.14                                                           | 55.87                                                                       | 23.9                                        | 1.68                                 | 2.46                                    |
| 25Au@Cu <sub>2</sub> O | 74.41                             | 2.14 | 1.17                                                           | 57.44                                                                       | 19.9                                        | 0.96                                 | 2.19                                    |
| 33Au@Cu <sub>2</sub> O | 76.93                             | 2.31 | 1.21                                                           | 57.41                                                                       | 22.8                                        | 0.93                                 | 2.32                                    |

[a] Cu and Au Content analyzed by ICP-OES. [b] Calculated by the DFT model from the adsorption branches of the isotherms. [c] Calculated by the multipoint BET model from the adsorption data. [d] Reaction conditions: the catalyst (0.25g) was dispersed in 35wt.% formaldehyde solution (5ml), and reacted at 90°C for 10 h with the C<sub>2</sub>H<sub>2</sub> flow rate of 30 ml/min.

**Table S2.** Peak position of Cu species, chemical shift  $\Delta E_k$ , molar ratio of  $\text{Cu}^+ / (\text{Cu}^0 + \text{Cu}^+)$  on the different used catalysts surfaces, and proportion of  $\text{Cu}_2\text{C}_2$  to Carbyne in different used catalysts<sup>[a]</sup>.

| Catalyst                        | Core size (nm) | Surface information               |               |                         |                                                       | Bulk information $\text{Cu}_2\text{C}_2/\text{polycarbon}^{[d]}$ | Ref.      |
|---------------------------------|----------------|-----------------------------------|---------------|-------------------------|-------------------------------------------------------|------------------------------------------------------------------|-----------|
|                                 |                | Peak position <sup>[b]</sup> (eV) |               | $\Delta E_k^{[c]}$ (eV) | $\text{Cu}^+ / (\text{Cu}^0 + \text{Cu}^+)^{[b]}$ (%) |                                                                  |           |
|                                 |                | $\text{Cu}^+$                     | $\text{Cu}^0$ |                         |                                                       |                                                                  |           |
| pure $\text{Cu}_2\text{O}$      | --             | 916.8                             | 918.6         | --                      | 67.6                                                  | 1.19:1                                                           | [1]       |
|                                 | 33             | 916.5                             | 918.3         | -0.3                    | 83.9                                                  | 1.29:1                                                           |           |
|                                 | 25             | 916.4                             | 918.2         | -0.4                    | 85.8                                                  | 1.40:1                                                           |           |
| $\text{Au}@\text{Cu}_2\text{O}$ | 16             | 916.2                             | 918.0         | -0.6                    | 88.4                                                  | 1.60:1                                                           | this work |
|                                 | 13             | 916.1                             | 917.9         | -0.7                    | 88.7                                                  | 1.64:1                                                           |           |
|                                 | 11             | 916.1                             | 917.9         | -0.7                    | 89.1                                                  | 1.66:1                                                           |           |

[a] Reaction conditions: the catalyst (0.25g) was dispersed in 35 wt.% formaldehyde solution (5ml), and reacted at 90°C for 10 h with the  $\text{C}_2\text{H}_2$  flow rate of 30 ml/min. [b] Peak position of Cu species and molar ratio of  $\text{Cu}^+$  to  $\text{Cu}^0 + \text{Cu}^+$  were obtained from Figure S8. [c] The XAES chemical shift of  $\text{Cu}^+$  for the used catalyst is represented by  $\Delta E_k$ ,  $\Delta E_k = E_k(\text{Au}@\text{Cu}_2\text{O}) - E_k(\text{pure Cu}_2\text{O})$ . [d] Proportion of  $\text{Cu}_2\text{C}_2$  to polycarbon was obtained from Figure S7.

**Table S3.** Specific fitting function equations and model parameters.

|                                                                        | Model     | Equation                                           | Equation parameters |       |       |      |        |
|------------------------------------------------------------------------|-----------|----------------------------------------------------|---------------------|-------|-------|------|--------|
|                                                                        |           |                                                    | $A_1$               | $A_2$ | $x_0$ | $dx$ | $R^2$  |
| $\text{Cu}^+ / (\text{Cu}^0 + \text{Cu}^+)$<br><i>VS.</i> $\Delta E_b$ |           |                                                    | 0.28                | 0.08  | 26.03 | 3.87 | 1      |
| $\text{Cu}_2\text{C}_2 / \text{polycarbon}$<br><i>VS.</i> $\Delta E_b$ |           |                                                    | 0.41                | 0.08  | 22.26 | 4.45 | 1      |
| $\text{Cu}^+ / (\text{Cu}^0 + \text{Cu}^+)$<br><i>VS.</i> Au core size | Boltzmann | $y = A_2 + \frac{A_1 - A_2}{1 + \exp[(x-x_0)/dx]}$ | 89.5                | 83.07 | 23.49 | 4.97 | 0.9998 |
| $\text{Cu}_2\text{C}_2 / \text{polycarbon}$<br><i>VS.</i> Au core size |           |                                                    | 1.70                | 1.26  | 21.69 | 4.55 | 1      |
| TOF <i>VS.</i> Au core size                                            |           |                                                    | 0.73                | 0.39  | 21.85 | 1.87 | 1      |

## References

[1] X. Huang, H. Li, Y. Zhang, R. Wu, L. Ban, L. Xi, Z. Yin, J. Peng, Y. Zhao and L. Fang, *Nanoscale*, 2022, **14**, 13248–13260.
